# Supplementary material
Source: PubMed Central journal article supplement (PMC5101581)
Supplement: f-72-00804-sup1.pdf [file f-72-00804-sup1.pdf]

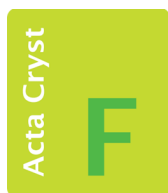

STRUCTURAL BIOLOGY  
COMMUNICATIONS

**Volume 72 (2016)**

**Supporting information for article:**

**Crystal structure of a phosphoribosyl anthranilate isomerase from the hyperthermophilic archaeon *Thermococcus kodakaraensis***

**Sumera Perveen, Naeem Rashid and Anastassios C. Papageorgiou**

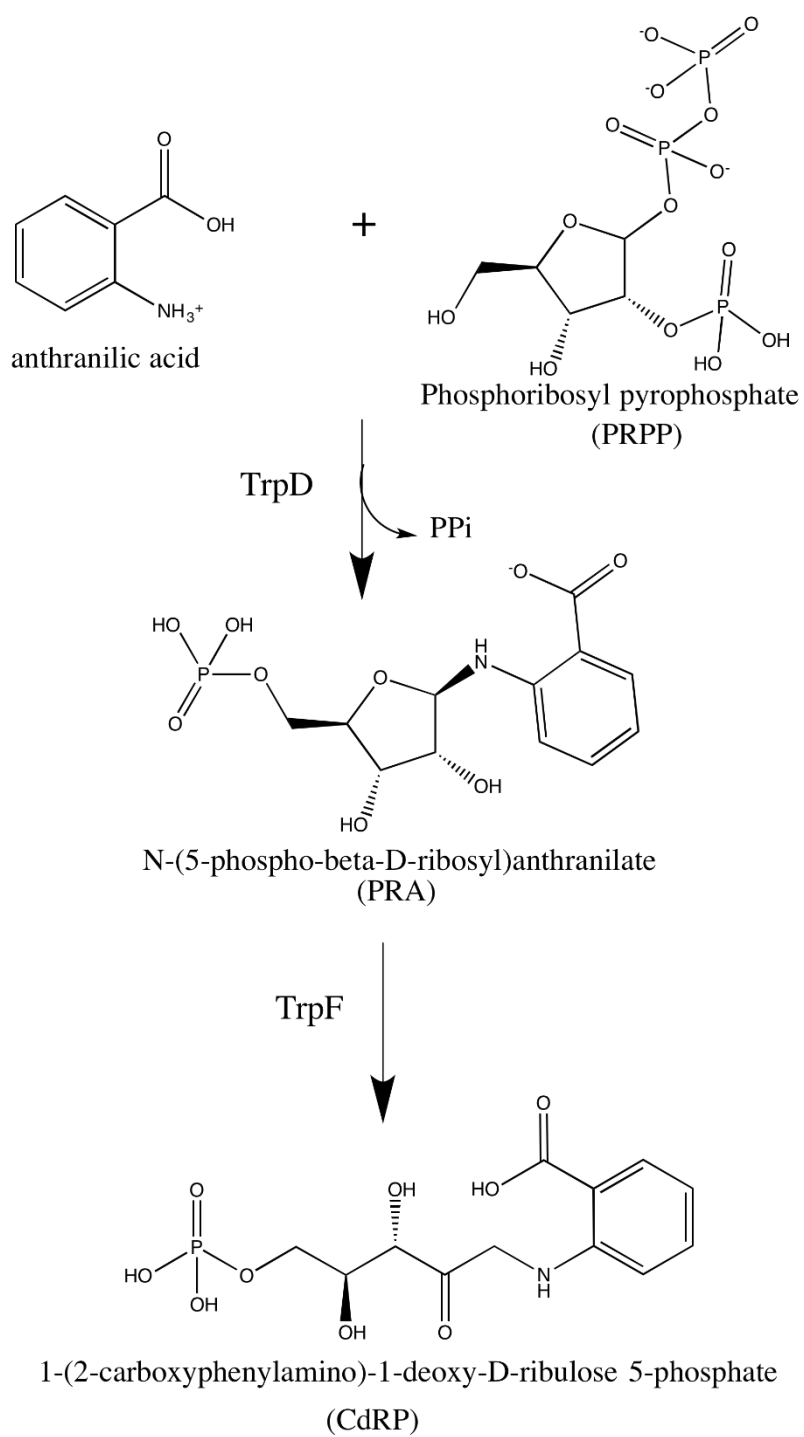

**Figure S1** The enzymatic reactions used for the determination of *TkTrpF* activity.

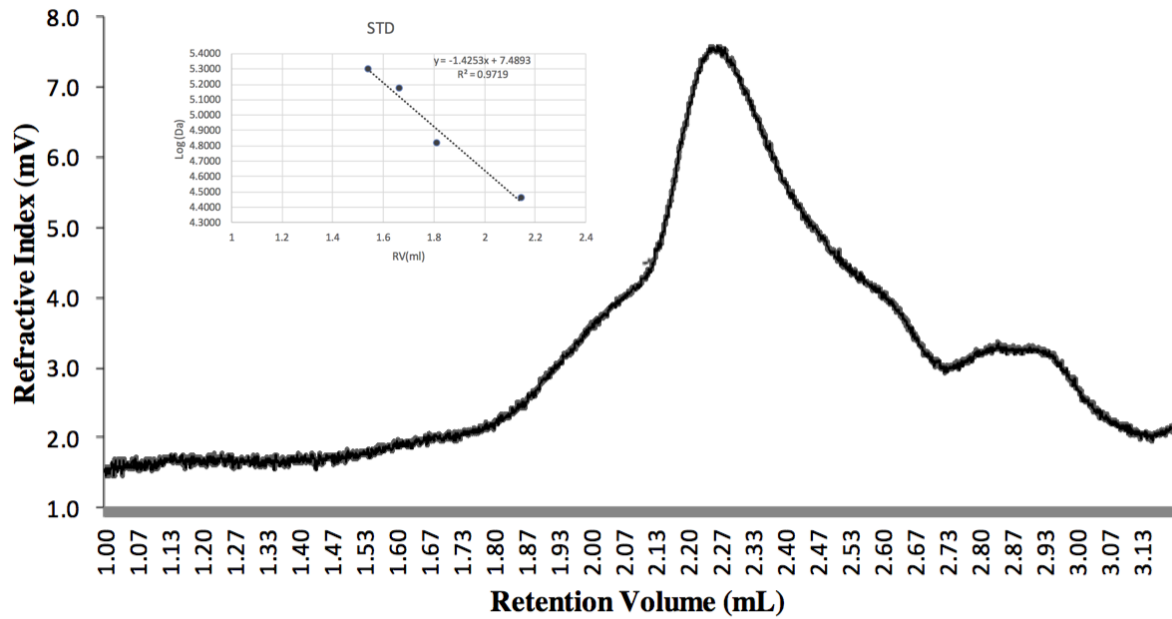

**Figure S2** Elution profile of *TkTrpF* from Superdex 200 5/150 gel filtration column. The retention volume (RV) is depicted on the X-axis. The buffer was 10 mM Tris-HCl, 100 mM NaCl, pH ~7.2 and the flowrate 0.1 mL/min. (*inset*) Standard curve. The MWs of the proteins used as standards are given as log scale on the Y-axis.
